# Supplementary material for: A lignin-based membrane fabricated with a deep eutectic solvent
Source: Royal Society of Chemistry journal article supplement (doi:10.1039/d3gc00658a), 2023-01-01
Supplement: d3gc00658a1.pdf [file d3gc00658a1.pdf]

## Lignin-based membrane fabricated with deep eutectic solvent

Abaynesh Yihdego Gebreyohannes<sup>1,2</sup>, Sandra L. Aristizábal<sup>1,2</sup>, Liliana Siliva<sup>1,3</sup>, Eyad Qasem<sup>4</sup>, Stefan Chisca<sup>1,2</sup>, Lakshmeesha Upadhyaya<sup>1,2</sup>, Daniyah Althobaiti<sup>1,2</sup>, João A. P. Coutinho<sup>3</sup> and Suzana P. Nunes<sup>1,2, 4, 5\*</sup>

<sup>1</sup>Environmental Science and Engineering, Biological and Environmental Science and Engineering Division (BESE), King Abdullah University of Science and Technology (KAUST), 23955-6900 Thuwal, Saudi Arabia

<sup>2</sup>Advanced Membranes and Porous Materials Center (AMPM), King Abdullah University of Science and Technology (KAUST)

<sup>3</sup>CICECO- Aveiro Institute of Materials, Department of Chemistry, University of Aveiro, 3810-193, Aveiro, Portugal

<sup>4</sup>Chemical Engineering, Physical Science and Engineering Division (PSE), King Abdullah University of Science and Technology (KAUST)

<sup>5</sup>Chemistry, Physical Science and Engineering Division (PSE), King Abdullah University of Science and Technology (KAUST)

\*Corresponding author: Prof. Suzana P. Nunes

Email: [suzana.nunes@kaust.edu.sa](mailto:suzana.nunes@kaust.edu.sa)

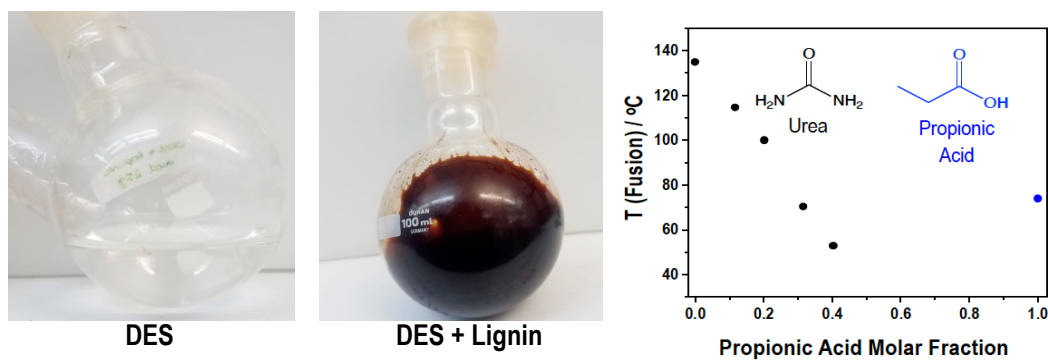

Figure S1. Deep eutectic solvent (urea and propionic acid mixture) (DES); lignin dissolved in DES and phase diagram for propionic the acid: urea mixture.

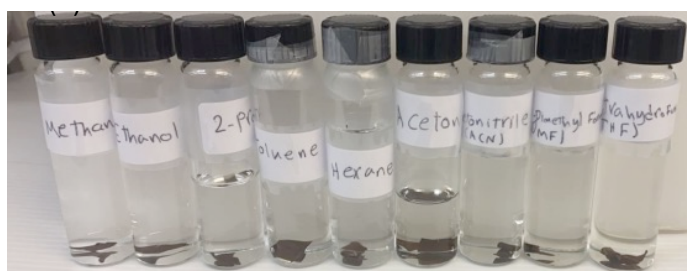

Figure S2. Stability of lignin membranes in ethanol, methanol, isopropanol, acetone, acetonitrile, hexane, toluene, tetrahydrofuran, and *N,N*-dimethylformamide solution under static condition at 23°C, 8 weeks after soaking.

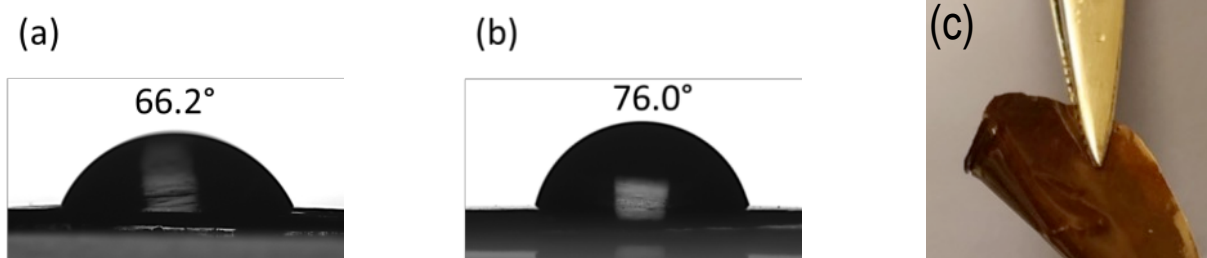

Figure S3. Water contact angle (a) before crosslinking, (b) after crosslinking, and (c) photograph of a bent membrane.

Table S1. Physicochemical properties of solvents used in the permeation test <sup>37-39</sup>.

| Solvent      | d <sub>m</sub><br>(nm) | η <sub>25°C</sub><br>(mPa s) | HSP (MPa <sup>0.5</sup> ) |                |                | Swelling               |                       |                              |
|--------------|------------------------|------------------------------|---------------------------|----------------|----------------|------------------------|-----------------------|------------------------------|
|              |                        |                              | δ <sub>p</sub>            | δ <sub>H</sub> | δ <sub>D</sub> | Mass<br>Before<br>(mg) | Mass<br>After<br>(mg) | Degree of<br>Swelling<br>(%) |
| Water        | 0.26                   | 0.92                         | 16                        | 42             | 16             | 0.9                    | 1.8                   | 99                           |
| Acetone      | 0.47                   | 0.31                         | 10                        | 7              | 16             | 1.2                    | 1.8                   | 50                           |
| Methanol     | 0.38                   | 0.54                         | 12                        | 22             | 15             | 0.6                    | 1.8                   | 200                          |
| Kraft lignin |                        | -                            | 14                        | 17             | 22             | -                      | -                     | -                            |

Viscosity (η); Kinetic diameter (d); Hansen solubility parameter (HSP).

#### Degree of swelling

The degree of swelling of the cross-linked membrane was measured by soaking the membrane (vacuum dried) in various organic solvents for 48 h. To measure the gel content, the samples were weighed and then dried in a vacuum oven at 60°C for 24 h. The degree of swelling, solvent uptake, and weight loss are calculated using equation S1.

$$Q = \frac{1}{\rho} * \frac{W_{wet} - W_{dry}}{W_{dry}} \quad 1$$

where, Q the degree of swelling, ρ the liquid density, W<sub>wet</sub> and W<sub>dry</sub> the weight of the membrane sample before and after soaking.

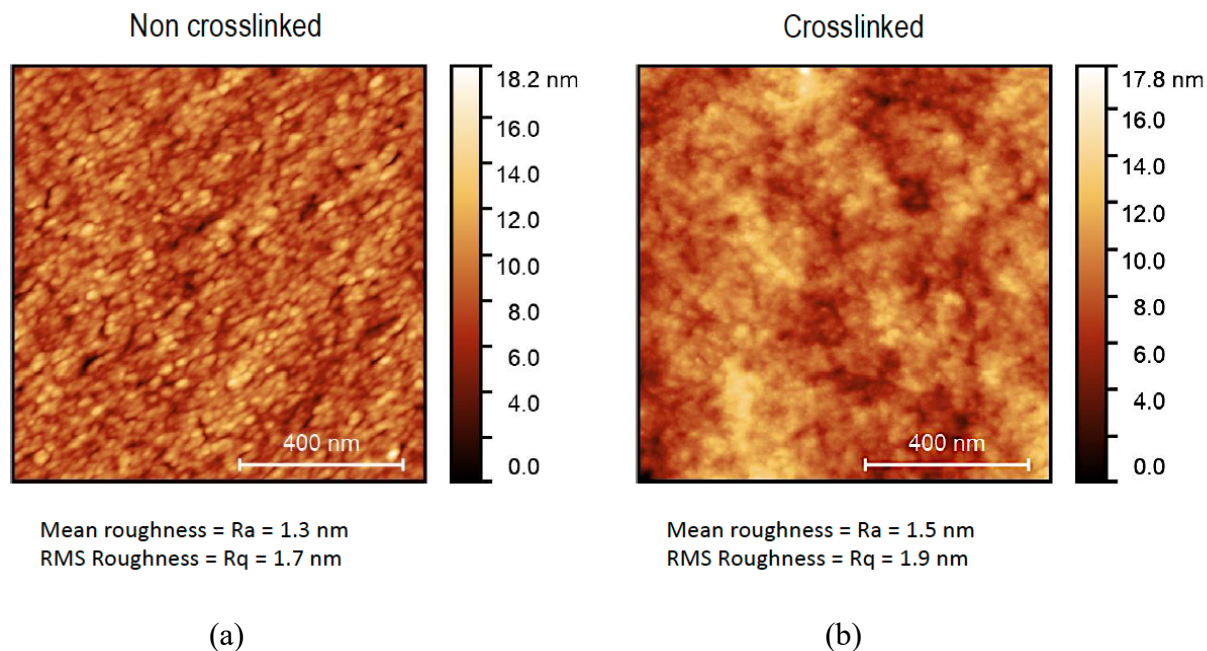

Figure S4. AFM images of membranes cast from a solution of 22 wt % lignin in DES (a) before and (b) after crosslinking with 5% 1,4-butanediol diglycidyl ether and storing in water.

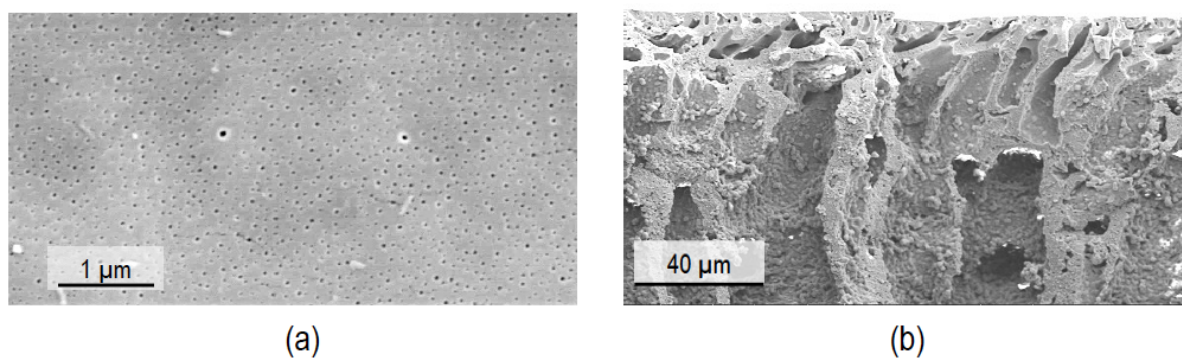

Figure S5. SEM images of (a) cross-section and (b) surface of a membrane cast from a solution of 20 wt % lignin in DES after crosslinking with 5% 1,4-butanediol diglycidyl ether and storing in water.

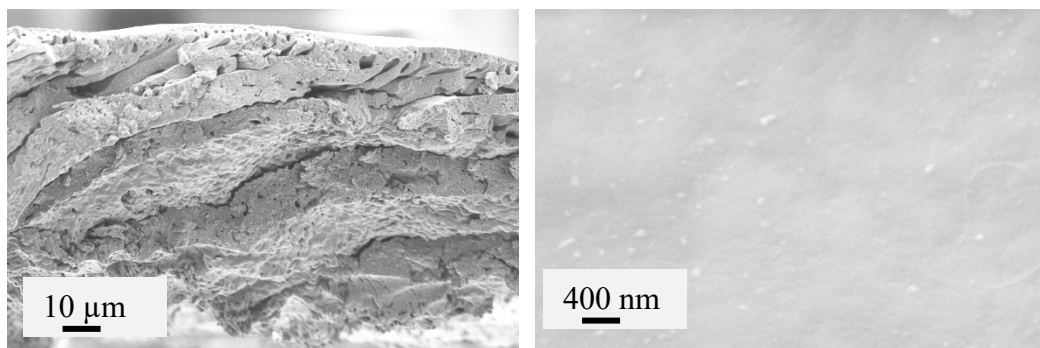

Figure S6. SEM images of (a) cross-section and (b) surface of a membrane cast from a 22 wt% lignin solution in DES, after crosslinking and sequential filtration of water, methanol and acetone at 19 bar.
